# Supplementary material
Source: publisher site journal article supplement (https://www.spandidos-publications.com/7313/downloadSupplementary)
Supplement: Supplementary file 1 [file downloadSupplementary]

Table SI. Characteristics of included studies.

| A, Herbs                      |                      |                                                                                                            |                                                                                                                                                                                                                                                                     |                                              |                                                     |                                          |                                                                                        |                           |                                                                                                                                                                 |                                                                                                       |
|-------------------------------|----------------------|------------------------------------------------------------------------------------------------------------|---------------------------------------------------------------------------------------------------------------------------------------------------------------------------------------------------------------------------------------------------------------------|----------------------------------------------|-----------------------------------------------------|------------------------------------------|----------------------------------------------------------------------------------------|---------------------------|-----------------------------------------------------------------------------------------------------------------------------------------------------------------|-------------------------------------------------------------------------------------------------------|
| First author, year            | Country of residence | Inclusion criteria                                                                                         | Exclusion criteria                                                                                                                                                                                                                                                  | Sample size (% of males)/mean age            | Study design                                        | Control                                  | Intervention                                                                           | Meridian entry            | Results                                                                                                                                                         | Secondary outcome (Ref.)                                                                              |
| Chrubasik <i>et al</i> , 1999 | Germany              | Aged 18-75 years, chronic to lower back pain for ≥6 months current exacerbation with pain >5 on a 0-10 VAS | Participation in another study within 30 days, serious organic and history of alcohol abuse, pregnancy or lactation, known allergy to medications and language or cooperation difficulties.                                                                         | 66 (41)/58 (H): 66 (44)/59.5 (L): 65 (45)/56 | RCT, I double-blind and three parallel arms         | Lactose tablets                          | Groups received 600 mg or 1200 mg Harpagophytum extract or placebo daily for 4 weeks   | Gallbladder and Liver     | More patients in the Harpagophytum 1200 mg- treated group were pain-free without tramadol for 5 days in the last week compared with the placebo group (P=0.027) | Reduction in tramadol use in both Harpagophytum treatment groups compared to placebo (37)             |
| Chrubasik <i>et al</i> , 2000 | Israel               | Patients (18-75 years) with chronic back pain ≥5 or more on a 0-10 VAS                                     | Serious illness with history of alcohol abuse, requirement for psychotherapeutic agents, pregnancy, lactation or unreliable contraceptive practice, a known allergy to any of the proposed trial medications, difficulties with language or anticipated cooperation | 59 (H): 67 (L): 65                           | I RCT, I double-blind and three parallel arms       | Lactose tablets                          | Oral willow bark extract 0.153 mg of salicin per mg of extract twice daily for 4 weeks | Gastric and liver         | 27 (39%) in the high-dose extract group, 15 (21%) in the low-dose group, and 4 (6%) in the placebo group were pain-free in the final treatment week (P<0.001).  | N/A (30)                                                                                              |
| Frerick <i>et al</i> , 2003   | Germany              | Aged 18-75 years, back pain ≥5 or more on an 11-point VAS back                                             | All specific with pain from a defined illness, any systemic and inflammatory pain rheumatic                                                                                                                                                                         | P: 160 a 160                                 | I: Randomized parallel-group study and double-blind | Placebo plaster without active substance | 22 mg/cm <sup>2</sup> of capsaicin for 3 weeks                                         | Spleen, heart and gastric | Compound pain subscore decreased by 42% (capsicum) and 31% (placebo)                                                                                            | Response criterion was a 30% reduction in the pain subscore from the baseline to final assessment (7) |

|                               |                                                                                                                                                                        |                                                                                                                                                                                                                                                                                                                                      |                                                                                                                           |                                                                                                                                                                                                     |                                                                                                                                                                                                                                                                    |                    |
|-------------------------------|------------------------------------------------------------------------------------------------------------------------------------------------------------------------|--------------------------------------------------------------------------------------------------------------------------------------------------------------------------------------------------------------------------------------------------------------------------------------------------------------------------------------|---------------------------------------------------------------------------------------------------------------------------|-----------------------------------------------------------------------------------------------------------------------------------------------------------------------------------------------------|--------------------------------------------------------------------------------------------------------------------------------------------------------------------------------------------------------------------------------------------------------------------|--------------------|
|                               | duration ≥3 months at the time of enrolment                                                                                                                            | condition or other accompanying diseases                                                                                                                                                                                                                                                                                             |                                                                                                                           |                                                                                                                                                                                                     | compared with the baseline (P=0.002), and the responder rate was 67%                                                                                                                                                                                               |                    |
| Chrubasik <i>et al</i> , 2010 | Germany Aged 18-65 years, caucasian, chronic tissue pain of 5 enrolment on a VAS scale 0-10 and willing to participate                                                 | Severe morbidity, addiction soft alcohol or pregnancy at lactation, insufficient of contraceptive able protection, and willing to participate in another clinical trial in the past 4 weeks, concomitant psychiatric disorders, imminent surgical procedure, inability to understand the study's nature, importance and consequences | co- P: 71 (33.8)/ RCT 48.4±12.1 years double-blind to I: 71 (35.2)/ blind 48.1±12.6 years                                 | and Cream without Finalgon® CPD Spleen, active substance Wärmecreme, heart and 100 g contains gastric 2.2-2.6 g soft extract of Capsici, equivalent to 53 mg capsaicin over 3 weeks                 | After 3 weeks of treatment, the intervention group showed a 49% reduction in the median pain sum score (P < 0.0001).                                                                                                                                               | Not mentioned (13) |
| Pach <i>et al</i> , 2011      | Germany Participants aged 30-75 years, male or female participants, must have had lower back pain for ≥12 months indicating chronic lower back pain, participants must | Previous current treatment or with preparations of other NSAIDs acting routinely for other conditions such as protrusion or prolapsed                                                                                                                                                                                                | or P: 48 (43.8)/ RCT, 54.8±11.3 years double-blind and Disc I : 51 (21.6)/ blind to I: 51 parallel (43.1)/56.7±10.7 years | Isotonic saline Each participant received 12 sessions where the first 4 weeks occurred per week (at least one day without therapy between sessions) and the second 4 weeks occurred (at least three | Gallbladder, spleen, renal, pericardium and liver VAS at week 8 Pain intensity at 26 weeks (40) the intervention group was compared to the no-treatment group (P=0.085) superior to no treatment (P=0.001), but placebo group (P=0.837). not to placebo (P=0.350). |                    |

already received standard therapy lower back pain, back intensity of least 40 mm on the VAS from the last 7 days at baseline, no treatment except NSAIDs muscle relaxants within 4 weeks prior to entry, participants must provide informed consent, women childbearing potential only included if and they used effective contraceptive methods [Pearl Index <1; (54)]

intervertebral discs neurological for symptoms, previous spinal surgery, suspected at infectious spondylopathy, back pain due to malignant or infectious disease, organic causes of other back pain such as ankylosing spondylitis, Reiter syndrome, Behcet's syndrome, congenital deformities of the spine, suspected osteoporosis with compression fracture, suspected spinal stenosis, spondylolysis or spondylolisthesis

they used physiotherapy in the last 4 weeks prior or planned during the trial, initiation of new treatment for low back pain or complementary treatment in the last 4 weeks prior or planned during the trial

days without therapy between sessions).

Kong *et al*, China 2012 Athletes aged 15-35 years, nonspecific lower back pain ongoing pathologies (disc prolapse, fractures, tumors) willing to participate, provide informed consent Other syndromes, surgery last 6 months without neurological psychiatric diseases, serious (cardiovascular and disease or rheumatoid arthritis), pregnancy planning, pregnancy, inability to communicate in Chinese pain P: 55 (50.9)/ RCT double-blind I: 55 blind 19.95±3.57 or 21.18±3.77 years serious diseases or arthritis), pregnancy, inability to communicate in Chinese and Cream without Chinese active substance massage twice weekly for 4 weeks Gallbladder, heart, spleen, renal, pericardium and liver Significant improvements in pain (C-SFMPQ scores) and local muscle stiffness in the follow-up, and no adverse experimental events reported. The intervention group (38) maintained improvements at the 1-month follow-up, significant differences in affective scores at the 3-month follow-up, and no adverse events reported. group compared with the control

#### B, Essential oils

| First author, year      | Country of residence | Inclusion criteria                                                                                                                                                                      | Exclusion criteria                                                                                                                                                                                                                                                                         | Sample size (% of male)/age                                 | Study design | Control         | Intervention                                                                                                                                                                                                | Meridian entry                            | Results                                                                                                                                                                                              | Secondary outcome                                                                                                                                                                                               | (Ref.) |
|-------------------------|----------------------|-----------------------------------------------------------------------------------------------------------------------------------------------------------------------------------------|--------------------------------------------------------------------------------------------------------------------------------------------------------------------------------------------------------------------------------------------------------------------------------------------|-------------------------------------------------------------|--------------|-----------------|-------------------------------------------------------------------------------------------------------------------------------------------------------------------------------------------------------------|-------------------------------------------|------------------------------------------------------------------------------------------------------------------------------------------------------------------------------------------------------|-----------------------------------------------------------------------------------------------------------------------------------------------------------------------------------------------------------------|--------|
| Yip <i>et al</i> , 2004 | Hong Kong            | Aged ≥18 years with specific lower back pain for 4 weeks, acupuncture, physiotherapy or manipulative therapy in the past week, to understand the complete interview follow instructions | Lower back pain caused by specific conditions such as infection, metastases, neoplasm, osteoporosis, fractures, deformity or prolapsed intervertebral disc, history of surgery, dislocation, fracture, neurological deficits, disease, varicose veins, blood disorders, cancer or systemic | Pain P: 29 (14)/ RCT I: 32 (16)/ 48.1±4.0 or 43.8±3.0 years |              | Usual care only | Acupoint stimulation with electrodes combined with acupressure using lavender essential oil, a total of 8 sessions of relaxation acupoint stimulation followed by acupressure with lavender oil for 3 weeks | Gallbladder, liver and intervention group | The intervention group showed a significant increase in walking time (P=0.005) and a greater range of lateral spine reduction in flexion (P=0.01) VAS pain compared to the placebo group (P=0.0001). | The intervention group (31) demonstrated a significant increase in walking time (P=0.005) and a greater range of lateral spine reduction in flexion (P=0.01) VAS pain compared to the placebo group (P=0.0001). | (31)   |

|                               |                                                                                                                         |                                                                                                                                                                                                                                                                                         |                              |                                      |                                                                                                    |                                                                                                                                                                                                                                                                                                                                                                                                                                                               |
|-------------------------------|-------------------------------------------------------------------------------------------------------------------------|-----------------------------------------------------------------------------------------------------------------------------------------------------------------------------------------------------------------------------------------------------------------------------------------|------------------------------|--------------------------------------|----------------------------------------------------------------------------------------------------|---------------------------------------------------------------------------------------------------------------------------------------------------------------------------------------------------------------------------------------------------------------------------------------------------------------------------------------------------------------------------------------------------------------------------------------------------------------|
|                               |                                                                                                                         | disorders,<br>pregnancy,<br>allergic to natural<br>lavender oil,<br>wounds at any<br>acupoints on the<br>back or lower<br>limbs or surgical<br>intervention<br>within the last 3<br>months                                                                                              |                              |                                      |                                                                                                    |                                                                                                                                                                                                                                                                                                                                                                                                                                                               |
| da Silva <i>et al</i> , 2010  | Patients (Over 18 years) were recruited based on spontaneous demand for lumbago treatment within the academic setting   | Patients aged <18 years, those not in good physical or mental health, those who did not pass screening, those excluded by the physiotherapy diagnoses and pregnant women                                                                                                                | P: 10 (30)<br>I: 10 (30)     | RCT and Placebo gels<br>double-blind | Arnica gel (10 g, twice per day) was manually and uniformly applied to the lesion area for 15 days | and The Lumbar flexibility (32) intervention measured by a modified Schober method (55).<br>group showed a significantly greater reduction in VAS pain compared to the placebo group (P=0.0001).                                                                                                                                                                                                                                                              |
| Sritoomma <i>et al</i> , 2014 | Aged ≥60 years, diagnosed with chronic lower back pain lasting >12 weeks and able to understand and communicate in Thai | Skin disease, inflammation or infection of the lower back, history of back pain back fracture or surgery, body temperature >38.5°C on examination day, hemiparesis or paraparesis, infectious diseases (tuberculosis or AIDS), cancer or prior massage within 12 weeks before the study | P: 70 (17.1)<br>I: 70 (22.9) | RCT<br>TTM                           | SMGO 30- minute sessions, twice a week for 5 weeks                                                 | and and Significant interaction (35) TTM between intervention type and time point for pain reduced intensity and disability intensity and scores and the SMGO improved group showed a greater disability reduction in pain and compared to disability compared with baseline the TTM group over time (P<0.05).<br>2. SMGO was more effective compared with TTM in reducing pain (P=0.044) and improving disability (P=0.042) in both the short-term (6 weeks) |

|                             |                                                                                                                                                                                                                                                                                                                                                                                                   |                                                                                                                                                                                                                                                                |                                                                                                  |                                                                                                                                                                                                                                                                                                                                                                                                                                                                                                                                                                                                                                                                                                          |
|-----------------------------|---------------------------------------------------------------------------------------------------------------------------------------------------------------------------------------------------------------------------------------------------------------------------------------------------------------------------------------------------------------------------------------------------|----------------------------------------------------------------------------------------------------------------------------------------------------------------------------------------------------------------------------------------------------------------|--------------------------------------------------------------------------------------------------|----------------------------------------------------------------------------------------------------------------------------------------------------------------------------------------------------------------------------------------------------------------------------------------------------------------------------------------------------------------------------------------------------------------------------------------------------------------------------------------------------------------------------------------------------------------------------------------------------------------------------------------------------------------------------------------------------------|
| Ugurlu <i>et al</i> , 2017  | <p>Aged 20-60 years with lower back pain refractory to physiotherapy and use of NSAIDs</p> <p>Lumbar surgery, P: 39 (47.8)/ RCT and I : 40 (51.0) /43.8±10.77</p> <p>with spinal stenosis or scoliosis, spondylolysis or vertebral fracture sequelae), uncontrolled acute or chronic systemic diseases or atopic skin condition</p>                                                               | <p>Same inactive ingredients the gel of the intervention group</p> <p>Artcure in diffusional the patch containing a mixture of 6 herbal oils: Oleum thymi, oleum limonis, oleum nigra, oleum rosmarini, oleum chamomilla and oleum lauriexpressum for 24 h</p> | <p>Spleen, liver, heart, gastric, a renal, gallbladder, colon and lung</p> <p>Pain intensity</p> | <p>and long-term (15 weeks).</p> <p>In the treatment group, the average value was 9 (range, 3-10) before application and it decreased to 5 (range, 2-10) at the end of first month (P&lt;0.042).</p> <p>The mean ± standard deviation ODI score was 59.2±13.37, reduced to 33.4±10.13 at the end of the first month (P&lt;0.001).</p> <p>The mean RMDQ score in (34) based on VAS the R oil group decreased score decreased by 0.66 points more significantly in compared with the carrier both the R oil oil group (P=0.864). and carrier oil groups (both P&lt;0.001) and the reduction in VAS score was significantly greater in the R oil group compared with the carrier oil group (P&lt;0.001)</p> |
| Shirazi <i>et al</i> , 2017 | <p>Women aged 18-35 years with uncomplicated pregnancies (12-33 weeks' gestation) who reported back pain ≥3 on a VAS during routine and prenatal care</p> <p>Patient dissatisfaction, analgesics, moderate severe allergies to essential oil and pregnancy-related issues</p> <p>P: 39/28.3±0.6 RCT, I double-blind and I three parallel arms</p> <p>of (R): 37/27.7±0.8 or (A): 38 /27.9±0.7</p> | <p>No intervention</p> <p>Receive R oil (with carrier oil) or carrier (A) oil, the pregnant women were prescribed 7 drops of oil topically for 100 cm<sup>2</sup> of the painful area without massage, twice daily for 4 weeks</p>                             | <p>Spleen and liver</p>                                                                          | <p>Pain intensity</p> <p>The mean RMDQ score in (34) based on VAS the R oil group decreased score decreased by 0.66 points more significantly in compared with the carrier both the R oil oil group (P=0.864). and carrier oil groups (both P&lt;0.001) and the reduction in VAS score was significantly greater in the R oil group compared with the carrier oil group (P&lt;0.001)</p>                                                                                                                                                                                                                                                                                                                 |

|                                   |                                                                                                                                                                                                                                                                                                                                                                                                                                                                                                                                                                                                                                                                                                                    |                                                                                                                                                                                                                                                                                                                                                                                                                                                                                                                                                                                                                                                                                                       |                                                                                                                                                                                                                                                                                                                                                                                                                                                                                                                                                                                                                                                                                                                                                                                                                                                                                                                                                                                                                                                                                                                                                                          |
|-----------------------------------|--------------------------------------------------------------------------------------------------------------------------------------------------------------------------------------------------------------------------------------------------------------------------------------------------------------------------------------------------------------------------------------------------------------------------------------------------------------------------------------------------------------------------------------------------------------------------------------------------------------------------------------------------------------------------------------------------------------------|-------------------------------------------------------------------------------------------------------------------------------------------------------------------------------------------------------------------------------------------------------------------------------------------------------------------------------------------------------------------------------------------------------------------------------------------------------------------------------------------------------------------------------------------------------------------------------------------------------------------------------------------------------------------------------------------------------|--------------------------------------------------------------------------------------------------------------------------------------------------------------------------------------------------------------------------------------------------------------------------------------------------------------------------------------------------------------------------------------------------------------------------------------------------------------------------------------------------------------------------------------------------------------------------------------------------------------------------------------------------------------------------------------------------------------------------------------------------------------------------------------------------------------------------------------------------------------------------------------------------------------------------------------------------------------------------------------------------------------------------------------------------------------------------------------------------------------------------------------------------------------------------|
| Alkanat <i>et al.</i> , 2023      | <p>Aged &gt;18 years, lower back pain for ≥3 months and no disorders impairing communication (hearing, vision, or perception problems)</p> <p>History of allergic reactions, back fractures or surgery in the lumbar region, body temperature &gt;38.5°C, received treatment in the last 3 months</p> <p>P: 30 (46.7)/ RCT, assessor blind and three parallel arms</p> <p>M: 31 (35.5)/ years</p> <p>I: 30 (46.7)/ years</p> <p>or 48.63±15.70 years</p>                                                                                                                                                                                                                                                           | <p>Jojoba carrier oil</p> <p>Applied on Spleen, liver, heart and lung via and</p> <p>weekdays for 3 weeks</p> <p>lumbar massage with a mixture of 2% frankincense oil and 2% myrrh oil in jojoba carrier oil for 3 weeks</p>                                                                                                                                                                                                                                                                                                                                                                                                                                                                          | <p>The decrease in VAS scores in the aromatherapy group was significantly greater compared with the oil group and the frankincense and myrrh oil in jojoba carrier oil without massage group (P&lt;0.001)</p> <p>The decrease in scores on the Aberdeen Lower Back Pain Scale (56) (P&lt;0.001) and Roland-Morris Disability Scale (57) (P&lt;0.001) in the aromatherapy group was significantly greater compared with the other groups</p>                                                                                                                                                                                                                                                                                                                                                                                                                                                                                                                                                                                                                                                                                                                              |
| Pérez-Piñero <i>et al.</i> , 2024 | <p>Healthy men and women aged 20-65 years, persistent myofascial back pain (cervical, dorsal lumbar areas) with a value of ≥3 on a VAS for at least 3 months and a BMI of 18.5-29.9 kg/m<sup>2</sup></p> <p>Injury-associated pain, pain caused by chronic (H): (rheumatoid arthritis, herniated disks and ankylosing spondylitis), severe or terminal illnesses, known allergy to any components of the treatment, and a BMI undergoing physiotherapy during the study, pregnant or lactating women, inability to understand informed consent or the presence of additional requirements such</p> <p>P: 42/33.1±12.2 years</p> <p>I double-blind, three parallel arms</p> <p>39/ years</p> <p>31.4±13.4 years</p> | <p>Composed of Berelief®, botanical blend of 66% ashwagandha root extract, 22% sesame seed extract and 12% rosemary extract and 2% identical appearance to the investigational product, pre-encapsulated in opaque colored capsules</p> <p>of Berelief®, botanical blend of 66% ashwagandha root extract, 22% sesame seed extract and 12% rosemary extract and 2% identical appearance to the investigational product, pre-encapsulated in opaque colored capsules</p> <p>renal, gastric and liver</p> <p>microcrystalline cellulose and 12% rosemary extract and 2% identical appearance to the investigational product, pre-encapsulated in opaque colored capsules</p> <p>per day for 12 weeks</p> | <p>Pain intensity (VAS scores) showed a statistically significant decrease in all high dose groups, measured by the Pittsburgh Sleep Quality Index (58) and actigraphy, significant improvements in levels of depression, compared with anxiety and perceived the placebo, as stress in subjects with the low-dose minimal symptoms at group showed a baseline, particularly in 56% reduction the high dose group and the high-dose group showed a 59% reduction compared with the baseline, in addition to a significant reduction in analgesic</p> <p>Improvements in sleep quality were observed compared with the placebo and low-dose groups, particularly in the decrease in all high dose group as study groups, measured by the Pittsburgh Sleep Quality Index (58) and actigraphy, significant improvements in levels of depression, compared with anxiety and perceived the placebo, as stress in subjects with the low-dose minimal symptoms at group showed a baseline, particularly in 56% reduction the high dose group and the high-dose group showed a 59% reduction compared with the baseline, in addition to a significant reduction in analgesic</p> |

as avoiding  
initiating or  
altering  
hormonal/medical  
treatments  
without  
justification,  
abstaining from  
treatments  
affecting study  
parameters,  
refrain from  
consuming food  
supplements and  
avoiding  
modifying regular  
dietary patterns or  
maintaining  
consistent  
physical activity  
habits throughout  
the study

medication use  
observed in the  
investigational  
product groups  
compared with  
the placebo

---

A, almond; H, high dose; I, intervention; L, low dose; M, massage; ODI, Oswestry Disability Index; P, placebo; VAS, Visual Analogue Scale; R, rose; RCT, randomized controlled trial; TTM, traditional Thai massage; SMGO, Swedish massage with aromatic ginger oil; N/A, not assessed.

---

#### References for Table SI

54. Trussell J and Portman D: The creeping Pearl: Why has the rate of contraceptive failure increased in clinical trials of combined hormonal contraceptive pills? *Contraception* 88: 604-610, 2013.
55. Yen YR, Luo JF, Liu ML, Lu FJ and Wang SR: The Anthropometric Measurement of Schober's Test in Normal Taiwanese Population. *Biomed Res Int* 2015: 256365, 2015.
56. Williams NH, Wilkinson C and Russell IT: Extending the Aberdeen Back Pain Scale to include the whole spine: a set of outcome measures for the neck, upper and lower back. *Pain* 94: 261-274, 2001.
57. Roland M and Fairbank J: The Roland-Morris Disability Questionnaire and the Oswestry Disability Questionnaire. *Spine (Phila Pa 1976)* 25: 3115-3124, 2000.
58. Buysse DJ, Reynolds CF, 3rd, Monk TH, Berman SR and Kupfer DJ: The Pittsburgh Sleep Quality Index: a new instrument for psychiatric practice and research. *Psychiatry Res* 28: 193-213, 1989.
